# Supplementary material for: App Designs and Interactive Features to Increase mHealth Adoption: User Expectation Survey and Experiment
Source: PubMed Central journal article supplement (PMC8603164; doi:10.2196/29815), 2021-11-04
Supplement: mhealth_v9i11e29815_app1.pdf [file mhealth_v9i11e29815_app1.pdf]

**Appendix A.** App Preview Hot Spots for Attention and Use

Table A1. Attention and Predicted Use of Features in the High Prototypicality Fitness App ( $n = 165$ )

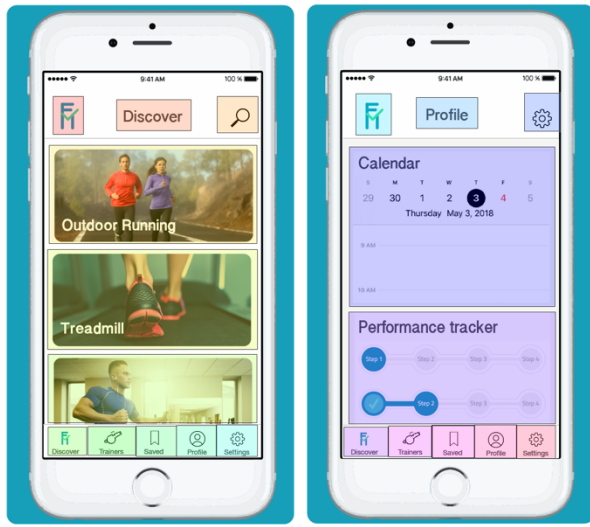

|                                    | Attention  |            | Use        |            | $\chi^2$     | <i>P</i>        |
|------------------------------------|------------|------------|------------|------------|--------------|-----------------|
|                                    | <i>n</i>   | %          | <i>n</i>   | %          |              |                 |
| <b>Left app preview</b>            |            |            |            |            |              |                 |
| Header app logo icon (top left)    | 38         | 23%        | 14         | 9%         | <b>17.63</b> | <b>&lt;.001</b> |
| Header page title (“Discover”)     | 34         | 21%        | 26         | 16%        | n/a          | .15             |
| Header search icon                 | 40         | 24%        | 57         | 35%        | <b>7.31</b>  | <b>.007</b>     |
| Activity 1 “Outdoor running”       | 109        | 66%        | 63         | 38%        | <b>32.66</b> | <b>&lt;.001</b> |
| Activity 2 “Treadmill”             | 104        | 63%        | 53         | 32%        | <b>38.46</b> | <b>&lt;.001</b> |
| Activity 3 “Individual Exercising” | 90         | 55%        | 36         | 22%        | <b>40.13</b> | <b>&lt;.001</b> |
| Footer menu option “Discover”      | 48         | 29%        | 52         | 32%        | .20          | .66             |
| Footer menu option “Trainers”      | 49         | 30%        | 36         | 22%        | 3.35         | .07             |
| Footer menu option “Saved”         | 41         | 25%        | 42         | 26%        | .00          | 1.00            |
| Footer menu option “Profile”       | 53         | 32%        | 70         | 42%        | <b>5.02</b>  | <b>.03</b>      |
| Footer menu option “Settings”      | 49         | 30%        | 69         | 42%        | <b>7.22</b>  | <b>.01</b>      |
| <b>Right app preview</b>           |            |            |            |            |              |                 |
| Header app logo icon (top left)    | 24         | 15%        | 11         | 7%         | n/a          | <b>.02</b>      |
| Header page title “Profile”        | 37         | 22%        | 32         | 19%        | .49          | .49             |
| Header settings icon               | 46         | 28%        | 62         | 38%        | <b>4.89</b>  | <b>.03</b>      |
| Calendar feature                   | <b>107</b> | <b>65%</b> | <b>118</b> | <b>72%</b> | 1.96         | .16             |
| Performance tracker feature        | 142        | 86%        | 157        | 95%        | <b>n/a</b>   | <b>.003</b>     |
| Footer menu option “Discover”      | 42         | 26%        | 48         | 29%        | .52          | .47             |
| Footer menu option “Trainers”      | 48         | 29%        | 39         | 24%        | 1.36         | .24             |
| Footer menu option “Saved”         | 40         | 24%        | 45         | 27%        | .37          | .54             |
| Footer menu option “Profile”       | 49         | 30%        | 75         | 46%        | <b>12.50</b> | <b>&lt;.001</b> |
| Footer menu option “Settings”      | 52         | 32%        | 71         | 43%        | <b>7.20</b>  | <b>.01</b>      |

Note: n/a = chi square values are not applicable if fewer than 25 discordant pairs; binominal distributions are used for exact 2-tailed significance in these comparisons.

Table A2. Attention and Predicted Use of Features in the High Prototypicality Nutrition App (*n* = 182)

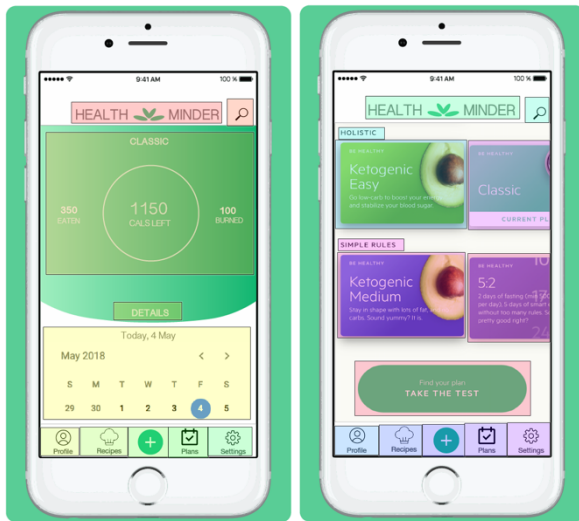

|                                   | Attention |     | Use      |     | $\chi^2$ | <i>P</i> |
|-----------------------------------|-----------|-----|----------|-----|----------|----------|
|                                   | <i>n</i>  | %   | <i>n</i> | %   |          |          |
| <b>(LEFT SIDE)</b>                |           |     |          |     |          |          |
| Header app logo icon (top middle) | 38        | 21% | 8        | 4%  | 23.36    | <.001    |
| Header search icon                | 19        | 10% | 54       | 30% | 21.81    | <.001    |
| Calorie tracker feature           | 156       | 86% | 160      | 88% | n/a      | .54      |
| Details icon                      | 14        | 8%  | 50       | 28% | 26.63    | <.001    |
| Calendar feature                  | 88        | 48% | 114      | 63% | 11.57    | .001     |
| Footer menu option “Profile”      | 37        | 20% | 90       | 50% | 38.09    | <.001    |
| Footer menu option “Recipes”      | 58        | 32% | 106      | 58% | 32.49    | <.001    |
| Footer menu option “Plus”         | 30        | 17% | 45       | 25% | 4.56     | .03      |
| Footer menu option “Plans”        | 50        | 28% | 102      | 56% | 36.13    | <.001    |
| Footer menu option “Settings”     | 35        | 19% | 87       | 48% | 36.13    | <.001    |
| <b>(RIGHT SIDE)</b>               |           |     |          |     |          |          |
| Header app logo icon (top middle) | 40        | 22% | 12       | 7%  | 20.25    | <.001    |
| Header search icon                | 21        | 12% | 38       | 21% | 5.95     | .02      |
| Holistic icon                     | 4         | 2%  | 9        | 5%  | n/a      | .13      |
| Ketogenic Easy feature            | 109       | 60% | 71       | 39% | 20.74    | <.001    |
| Footer menu option “Profile”      | 25        | 14% | 58       | 32% | 19.32    | <.001    |
| Footer menu option “Recipes”      | 45        | 25% | 80       | 44% | 18.95    | <.001    |
| Footer menu option “Plus”         | 23        | 13% | 28       | 15% | .46      | .50      |
| Footer menu option “Plans”        | 37        | 20% | 72       | 40% | 18.95    | <.001    |
| Footer menu option “Settings”     | 26        | 14% | 57       | 31% | 16.36    | <.001    |
| Classic feature                   | 70        | 39% | 46       | 25% | 11.50    | .001     |
| Simple rules icon                 | 3         | 2%  | 9        | 5%  | n/a      | .07      |
| Ketogenic Medium feature          | 101       | 56% | 68       | 37% | 16.25    | <.001    |
| 5:2 feature                       | 67        | 37% | 52       | 29% | 4.00     | .046     |
| Take the Test feature             | 108       | 59% | 131      | 72% | 9.88     | .002     |

Note: n/a = chi square values are not applicable if fewer than 25 discordant pairs; binominal distributions are used for exact 2-tailed significance in these comparisons.

## Appendix B. Survey items

| Concept                   | Item                                                                                                                                                                                                                                                                                   | Response options                                                                                                                                                                                                                                          |
|---------------------------|----------------------------------------------------------------------------------------------------------------------------------------------------------------------------------------------------------------------------------------------------------------------------------------|-----------------------------------------------------------------------------------------------------------------------------------------------------------------------------------------------------------------------------------------------------------|
| Feature expectation       | Select all the elements you would expect to find in a health app. <b>Check all that apply.</b>                                                                                                                                                                                         | 1 = Menu<br>2 = Search option<br>3 = Settings option<br>4 = Logo<br>5 = Log/Input data option<br>6 = Share with friends option<br>7 = Summary statistics<br>8 = Summary graph/chart<br>9 = Calendar<br>10 = Page title<br>11 = Login<br>12 = User profile |
| Feature Placement         | Where do you think the <b>[feature]</b> should appear in the health app?<br><br>Select all the areas on the app screen below where you would expect the <b>[feature]</b> to appear. Selected areas will be shown in green.                                                             | Hot spots                                                                                                                                                                                                                                                 |
| App choice                | Below are two health apps in development. Please review the apps and <b>select the app you would be most likely to download by checking the circle to the bottom left corner of the preview.</b> We will ask you questions about both, but first we want to know which one you prefer. | 1 = Low prototypicality app<br>2 = High prototypicality app                                                                                                                                                                                               |
| Attention                 | For your selected app, what elements in the app caught your <b>attention</b> ? Select all elements that grabbed your attention within the app preview below.                                                                                                                           | Hot spots                                                                                                                                                                                                                                                 |
| Predicted use             | For your selected app, what elements in the app do you think you would <b>use</b> ? Select all elements that you believe you would use within the app preview below.                                                                                                                   | Hot spots                                                                                                                                                                                                                                                 |
| Aesthetics: Simplicity    | The layout appears too dense. (reverse coded)<br>The layout is easy to grasp.<br>Everything goes together on this app.<br>The app appears patchy. (reverse coded)<br>The layout appears well structured.                                                                               | 1 = Strongly disagree<br>2 = Somewhat disagree<br>3 = Neither agree nor disagree<br>4 = Somewhat agree<br>5 = Strongly agree                                                                                                                              |
| Aesthetics: Diversity     | The layout is pleasantly varied.<br>The layout is inventive.<br>The design appears uninspired. (reverse coded)<br>The layout appears dynamic.<br>The design is uninteresting. (reverse coded)                                                                                          | 1 = Strongly disagree<br>2 = Somewhat disagree<br>3 = Neither agree nor disagree<br>4 = Somewhat agree<br>5 = Strongly agree                                                                                                                              |
| Aesthetics: Colorfulness  | The color composition is attractive.<br>The colors do not match. (reverse coded)<br>The choice of colors is botched. (reverse coded)<br>The colors are appealing.                                                                                                                      | 1 = Strongly disagree<br>2 = Somewhat disagree<br>3 = Neither agree nor disagree<br>4 = Somewhat agree<br>5 = Strongly agree                                                                                                                              |
| Aesthetics: Craftsmanship | The layout appears professionally designed.<br>The layout is not up-to-date. (reverse)<br>The app is designed with care.<br>The design of the app lacks a concept. (reverse)                                                                                                           | 1 = Strongly disagree<br>2 = Somewhat disagree<br>3 = Neither agree nor disagree<br>4 = Somewhat agree                                                                                                                                                    |

App Designs and Interactive Features to Increase mHealth Adoption: User Expectation Survey and Experiment

|                       |                                                                                                                                                                                              |                                                                                                                                                                                                                                                                                                                                                                                                                                                          |
|-----------------------|----------------------------------------------------------------------------------------------------------------------------------------------------------------------------------------------|----------------------------------------------------------------------------------------------------------------------------------------------------------------------------------------------------------------------------------------------------------------------------------------------------------------------------------------------------------------------------------------------------------------------------------------------------------|
|                       |                                                                                                                                                                                              | 5 = Strongly agree                                                                                                                                                                                                                                                                                                                                                                                                                                       |
| Perceived ease of use | The app would be clear and understandable.<br>Getting the app to function would not require much mental effort.<br>I would find the app easy to use.                                         | 1 = Strongly disagree<br>2 = Somewhat disagree<br>3 = Neither agree nor disagree<br>4 = Somewhat agree<br>5 = Strongly agree                                                                                                                                                                                                                                                                                                                             |
| Perceived usefulness  | Using the app would improve my health.<br>Using the app would make me more likely to meet my health goals.<br>I would find the app useful for achieving my health goals.                     | 1 = Strongly disagree<br>2 = Somewhat disagree<br>3 = Neither agree nor disagree<br>4 = Somewhat agree<br>5 = Strongly agree                                                                                                                                                                                                                                                                                                                             |
| Intention to use      | <b>[Randomized in construct matrix.]</b><br>If the app were available, I would intend to use it in the next month.<br>If the app were available, I predict I would use it in the next month. | 1 = Strongly disagree<br>2 = Somewhat disagree<br>3 = Neither agree nor disagree<br>4 = Somewhat agree<br>5 = Strongly agree                                                                                                                                                                                                                                                                                                                             |
| Perceived affordances | This app would allow me to...<br>Please check all that apply.                                                                                                                                | 1 = Set health goals<br>2 = Track my progress<br>3 = Create new health habits<br>4 = Learn health tips<br>5 = Interact with others<br>6 = Earn rewards<br>7 = Make meeting my health goals easier<br>8 = Improve my health<br>9 = Increase my control over my health<br>10 = Have fun with technology<br>11 = Give me more information about my health<br>12 = Share my health data with friends<br>13 = Share my health data with a healthcare provider |
| Age                   | How old are you?                                                                                                                                                                             |                                                                                                                                                                                                                                                                                                                                                                                                                                                          |
| Gender                | How do you describe your gender identity?                                                                                                                                                    | 1=Male<br>2=Female<br>3=Other                                                                                                                                                                                                                                                                                                                                                                                                                            |
| Hispanic              | Are you of Hispanic, Latino, or Spanish origin?                                                                                                                                              | 1=Yes<br>0=No                                                                                                                                                                                                                                                                                                                                                                                                                                            |
| Race                  | Which one of these groups would you say best represents your race?                                                                                                                           | 1 = White<br>2 = Black or African American<br>3 = American Indian or Alaska Native<br>4 = Asian, or<br>5 = Pacific Islander<br>6 = Multicultural<br>7=Other                                                                                                                                                                                                                                                                                              |
| Education             | What is the highest degree or level of school you have completed?                                                                                                                            | 1 = Some high school<br>2 = High school diploma or GED<br>3 = Some college, no degree<br>4 = Associate degree<br>5 = Bachelor's degree<br>6= Masters degree (e.g., MA, MS)                                                                                                                                                                                                                                                                               |

App Designs and Interactive Features to Increase mHealth Adoption: User Expectation Survey and Experiment

|                      |                                                    |                                                             |
|----------------------|----------------------------------------------------|-------------------------------------------------------------|
|                      |                                                    | 7 = Professional or Doctorate degree<br>(e.g., JD, MD, PhD) |
| Health status        | In general, would you say your health is ...       | 1=Very Poor<br>2=Poor<br>3=Fair<br>4=Good<br>5=Very Good    |
| Mental health status | In general, would you say your mental health is... | 1=Very Poor<br>2=Poor<br>3=Fair<br>4=Good<br>5=Very Good    |
| Health app use       | Do you use a health app?                           | 1=Yes<br>2=No                                               |
